# Supplementary material for: Near zero-strain silicon oxycarbide interphases for stable Li-ion batteries
Source: Royal Society of Chemistry journal article supplement (doi:10.1039/d3cc03799a), 2023-01-01
Supplement: d3cc03799a7.pdf [file d3cc03799a7.pdf]

## Supplemental Information

### **Near zero-strain silicon oxycarbide interphases for stable Li-ion batteries**

Su Jeong Yeom, Tae-Ung Wi, Soon-Jae Jung, Myeong Seon Kim, Sang-Chae Jeon, and Hyun-Wook Lee

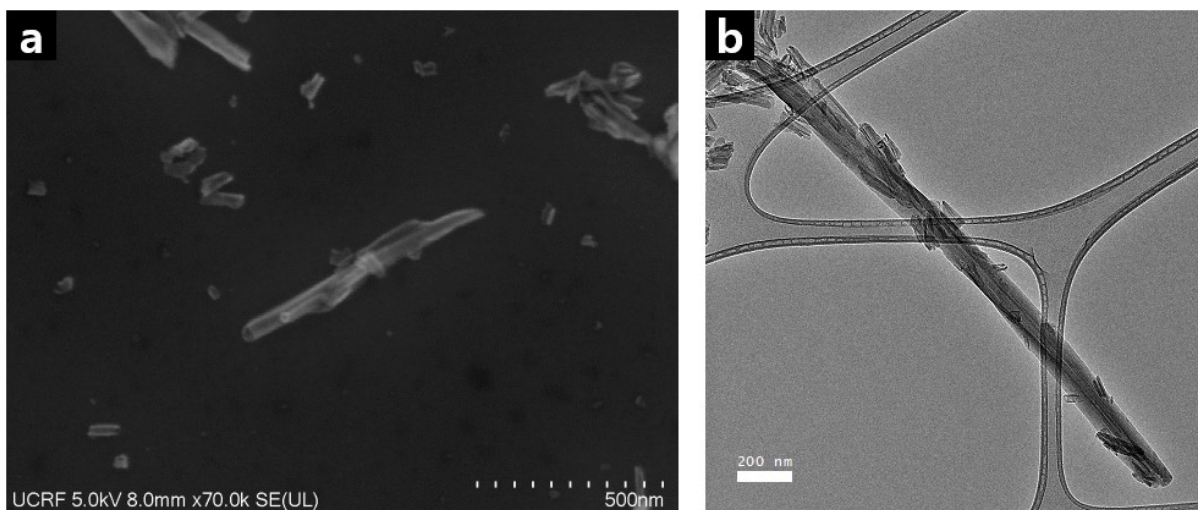

**Figure S1.** Morphology of SiNTs in (a) SEM and (b) TEM, magnification is rated as 25000X.

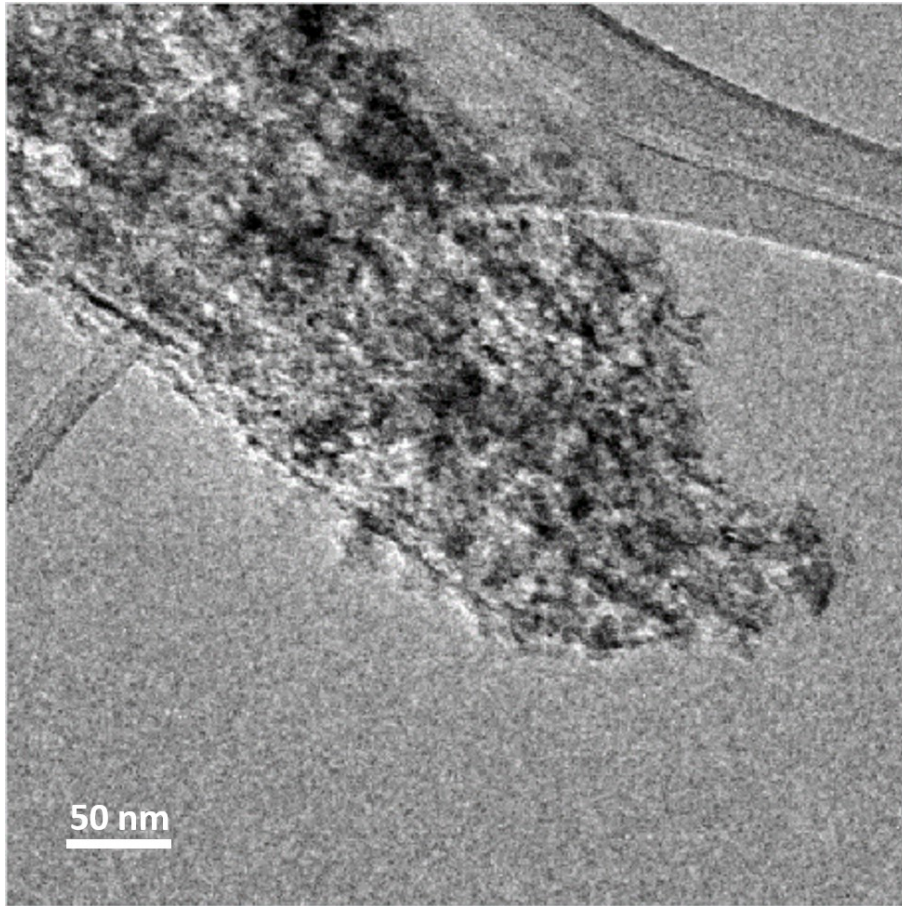

**Figure S2.** TEM images of SiNT@SiOC with bundles of interconnected nanoparticles.

SiNT@SiOC

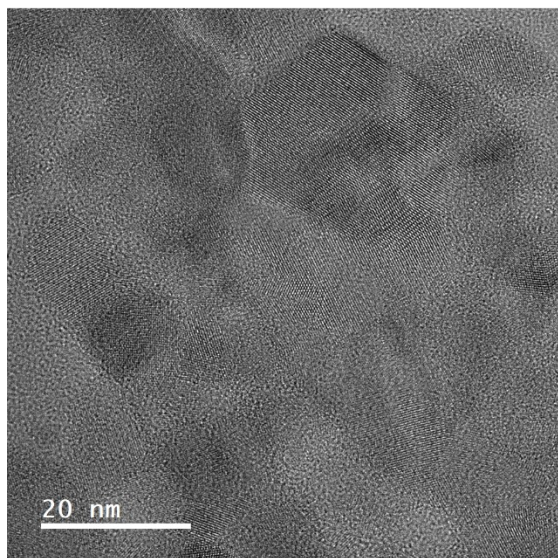

SiOC NT

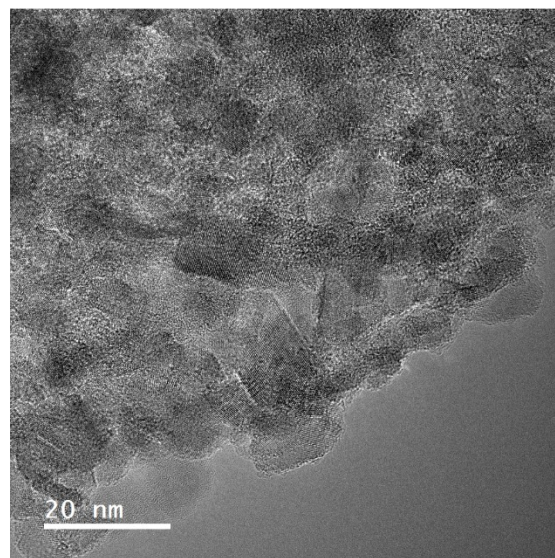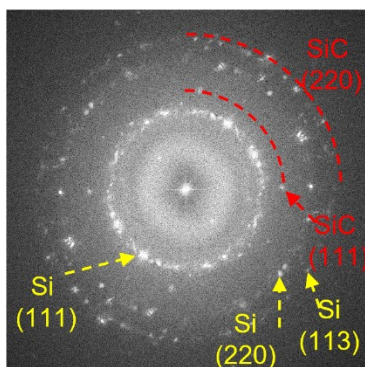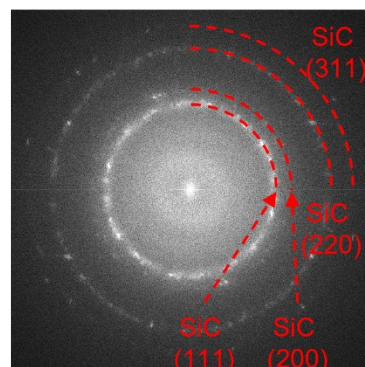

**Figure S3.** High magnification TEM images of SiNT@SiOC and pure SiOC nanotubes and according FFT images.

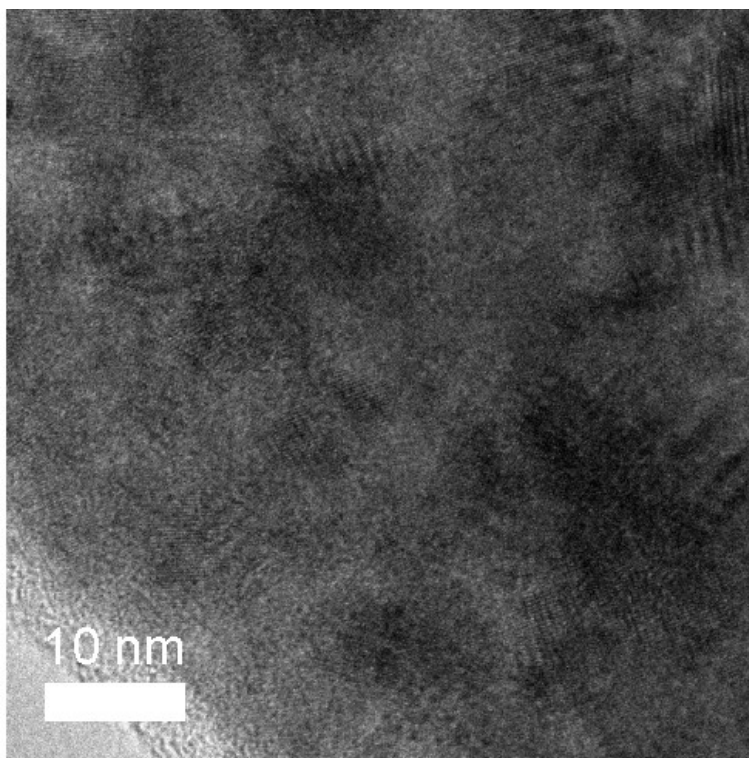

**Figure S4.** High-magnification image for the surface and bulk structure of SiNT@SiOC.

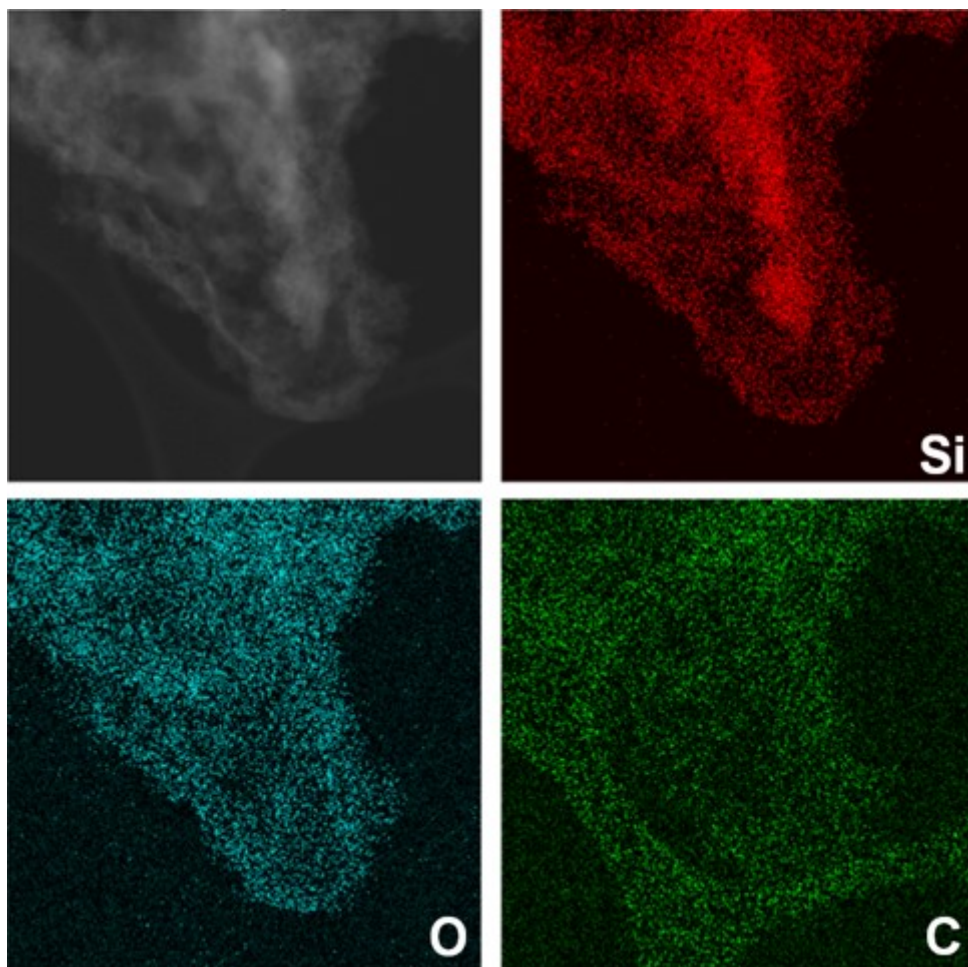

**Figure S5.** TEM-EDS mapping results of SiOC nanotubes.

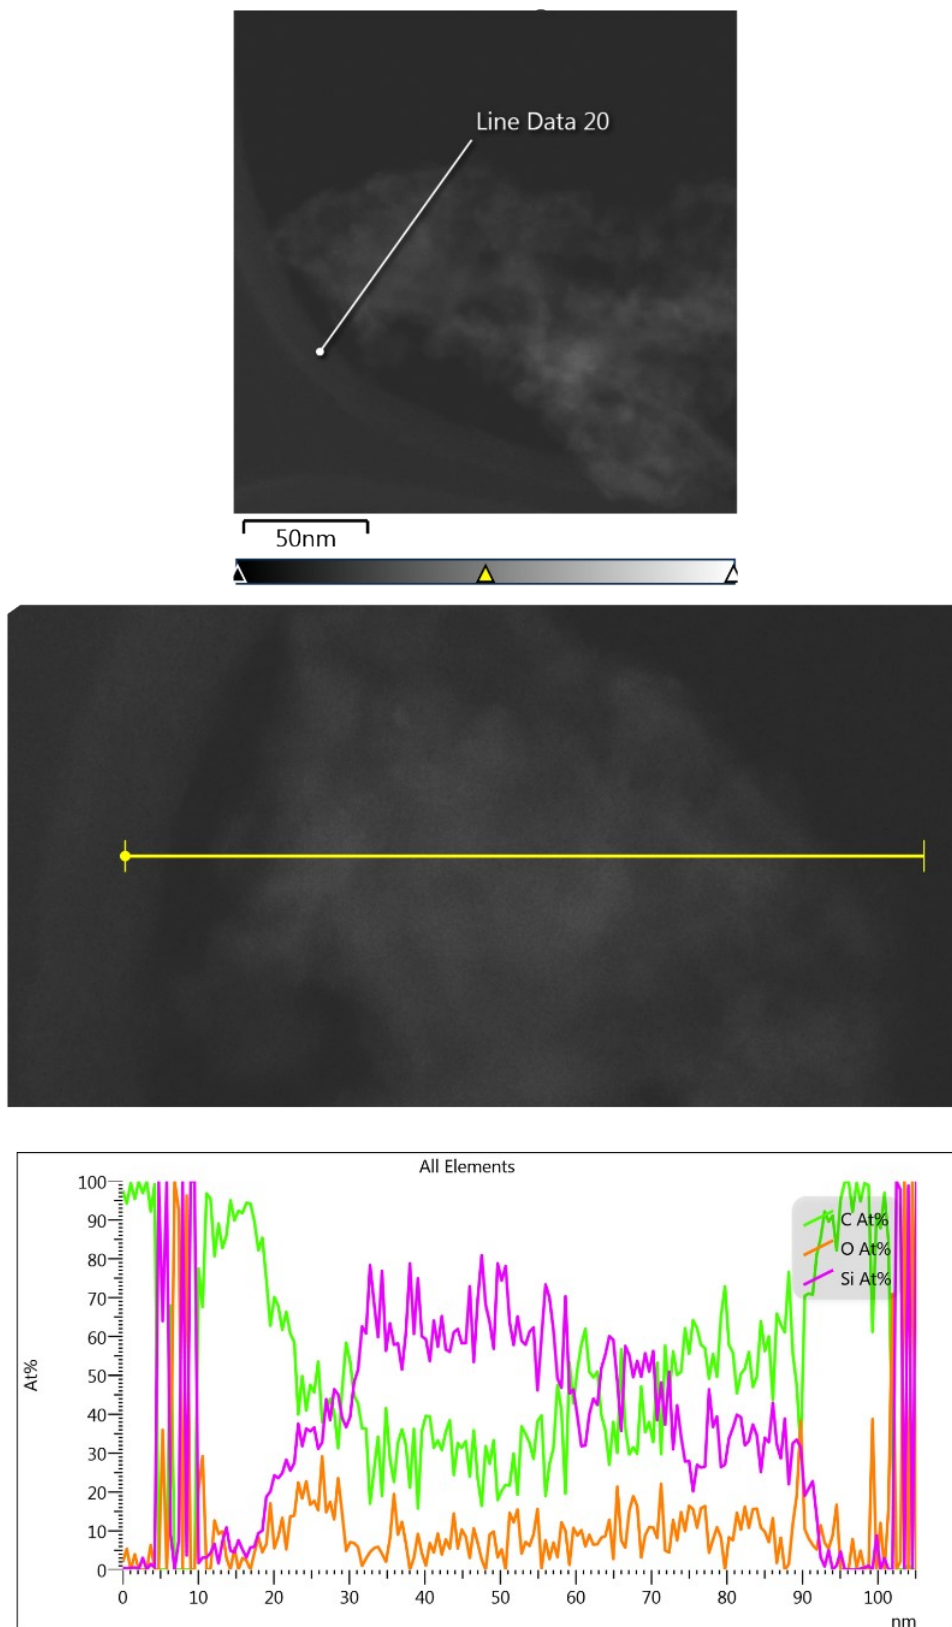

**Figure S6.** TEM-EDS line scan of SiOC horizontally across its structure.

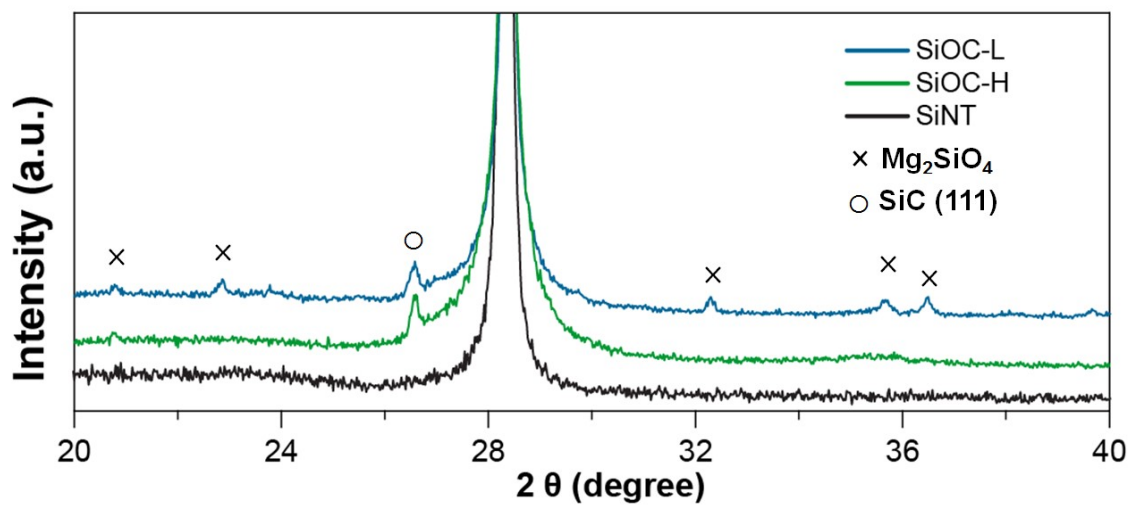

**Figure S7.** Structural characterization of SiOC-nanotubes. XRD spectra of the pristine SiNT, SiOC-L and SiOC-H.



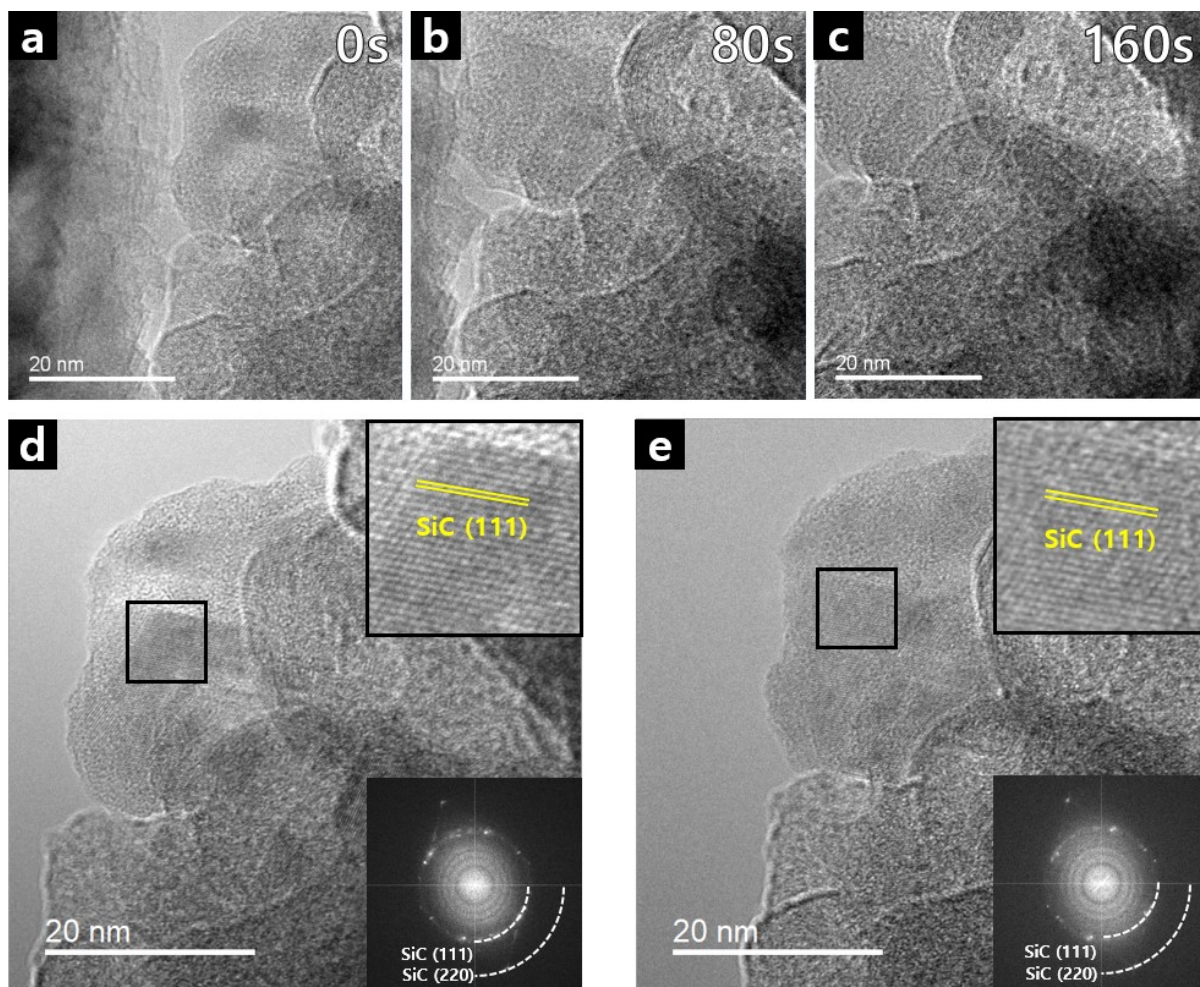

**Figure S8.** Lithiation behavior of pure silicon carbide observed by in-situ TEM analysis. (a)-(c) Time series of lithiation of pure silicon carbide for 160 s. High-magnification TEM images and according FFT images as an inset of (d) pristine silicon carbide and (e) lithiated silicon carbide.

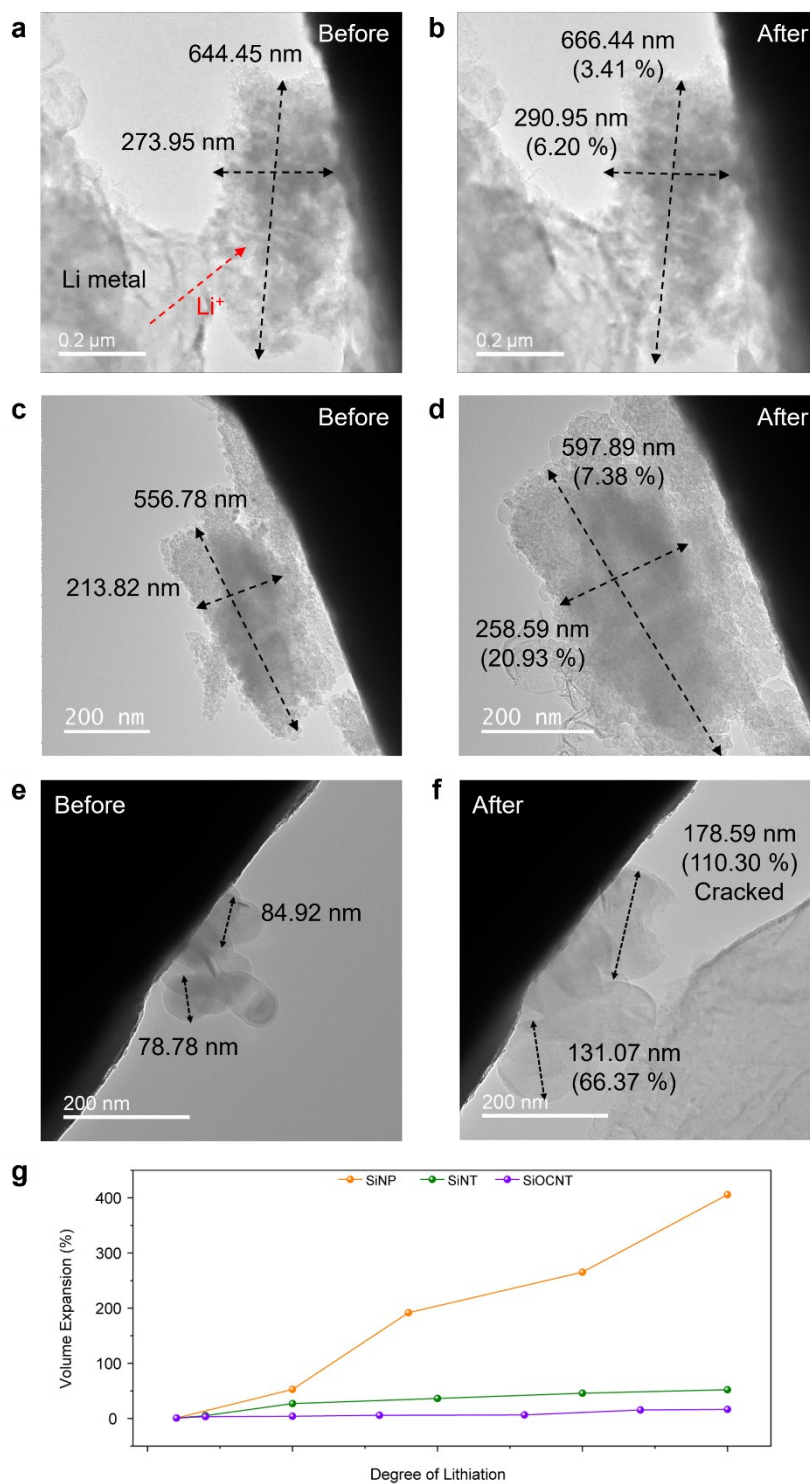

**Figure S9.** (a-f) Low magnification TEM images of SiNT@SiOC, SiNTs, and silicon nanoparticles (SiNPs) before and after lithiation reaction. (g) Fully lithiated SiNT@SiOC shows volume expansion ratio of only 3.41 % and 6.20 % in each length direction, respectively.

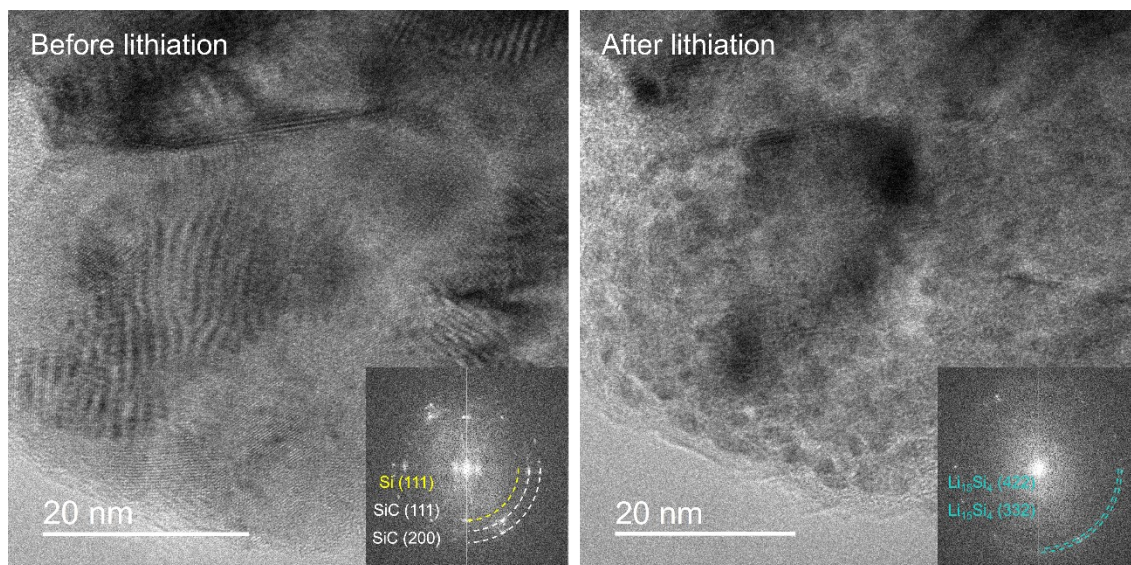

**Figure S10.** High magnification TEM images and corresponding FFT images inset of SiOC-L before and after lithiation.

**Table S1.** Atomic composition of SiNT, SiOC-L and SiOC-H confirmed by XPS.

| at %   | Si | O  | C  |
|--------|----|----|----|
| SiNT   | 54 | 46 | -  |
| SiOC-L | 55 | 21 | 24 |
| SiOC-H | 47 | 40 | 13 |

**Movie S1.** In-situ TEM movie of the lithiation behaviour of pure SiC in Figure S8.

**Movie S2.** In-situ TEM movie of the lithiation behaviour of SiOC-H in Figure 3.

**Movie S3.** In-situ TEM movie of the lithiation behaviour of SiNT@SiOC in Figure S9a,b.

**Movie S4.** In-situ TEM movie of the lithiation behaviour of SiNTs in Figure S9c,d.

**Movie S5.** In-situ TEM movie of the lithiation behaviour of SiNPs in Figure S9e,f.

**Movie S6.** In-situ TEM movie of the lithiation behaviour of SiOC-L in Figure S10.
